# Supplementary material for: Hybrid Sausages Using Pork and Cricket Flour: Texture and Oxidative Storage Stability
Source: MDPI journal article supplement (doi:10.3390/foods12061262), 2023-03-16
Supplement: s1 [file s1]

**Supplementary data****Table S1.** Visual observation of gelation of cricket flour in water and NaCl solutions.

|           | <b>CF content (% , g/100 mL)</b> |     |     |     |     |     |
|-----------|----------------------------------|-----|-----|-----|-----|-----|
|           | 1%                               | 3%  | 5%  | 10% | 20% | 30% |
| Milli-Q   | X A                              | X A | X A | O*  | O   | O   |
| NaCl 1M   | X A                              | X A | V   | O   | O   | O   |
| NaCl 2.1M | X A                              | X A | X A | O   | O   | O   |

CF: cricket flour

X: no gel formation

A: aggregation

V: viscous fluid

O: gel formation

O\*: top layer, free and clear liquid/water was observed

**Figure S1.** Visual observation of sausage color

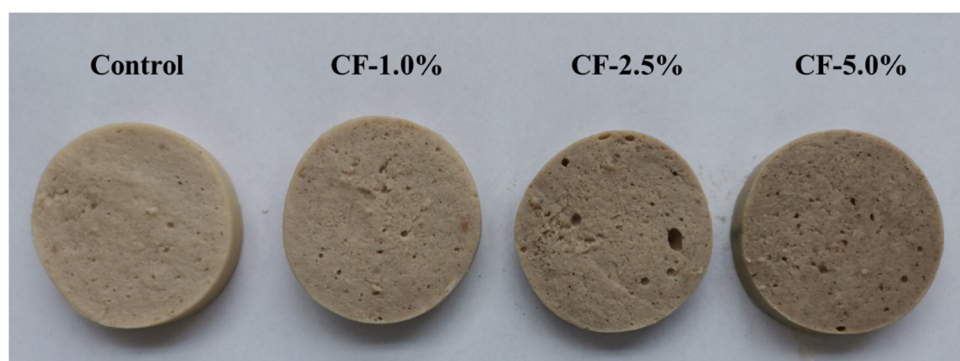

**Table S2.** Fatty acid composition of cricket flour, %

| Common names     |               | Mean   | Std.Deviation |
|------------------|---------------|--------|---------------|
| Lauric acid      | C12:0         | 0.1 %  | 0.0 %         |
| Myristic acid    | C14:0         | 0.7 %  | 0.1 %         |
| Myristoleic acid | C14:1         | 0.1 %  | 0.0 %         |
| Palmitic acid    | C16:0         | 34.9 % | 0.0 %         |
| Palmitoleic acid | C16:1         | 0.8 %  | 0.0 %         |
| Margaric acid    | C17:0         | 1.5 %  | 0.0 %         |
| Stearic acid     | C18:0         | 14.2 % | 0.2 %         |
| Oleic acid       | C18:1         | 0.9 %  | 0.1 %         |
| Linoleic acid    | C18:2         | 45.4 % | 0.2 %         |
| Linolenic acid   | C18:3         | 1.4 %  | 0.0 %         |
|                  | $\Sigma$ SFA  | 51.5 % | 0.3 %         |
|                  | $\Sigma$ MUFA | 1.8 %  | 0.1 %         |
|                  | $\Sigma$ PUFA | 46.8 % | 0.2 %         |

$\Sigma$ SFA: Total saturated fatty acids

$\Sigma$ MUFA: Total monounsaturated fatty acids

$\Sigma$ PUFA: Total polyunsaturated fatty acids

**Figure S2.** Fatty acid composition of cricket flour, bar chart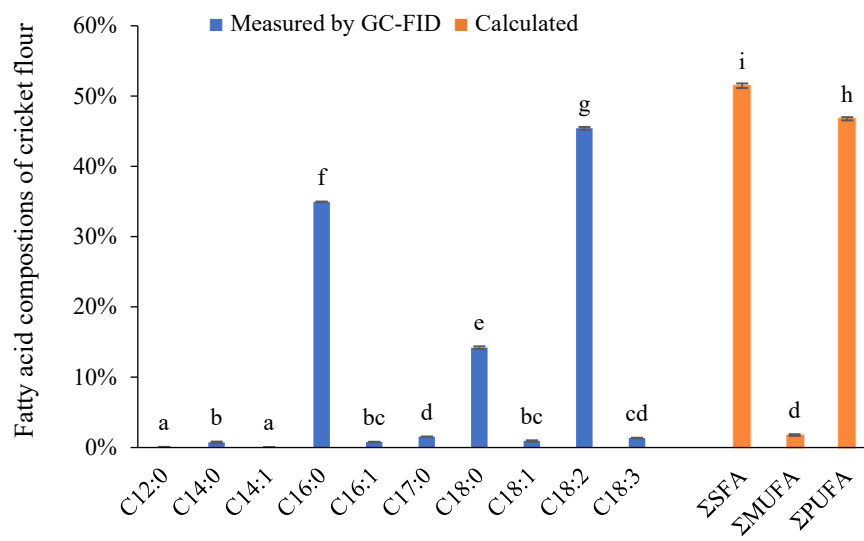

Significance differences ( $p < 0.05$ ) are denoted by different lowercase letters a, b, c, d, e, f.
